# Supplementary material for: Limited Systemic Sclerosis Patients with Pulmonary Arterial Hypertension Show Biomarkers of Inflammation and Vascular Injury
Source: PubMed Central journal article supplement (PMC2923145; doi:10.1371/journal.pone.0012106), 2010-08-17
Supplement: pone.0012106.s002.pdf [file pone.0012106.s002.pdf]

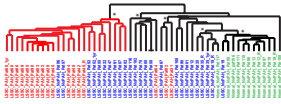

\*P < 0.001

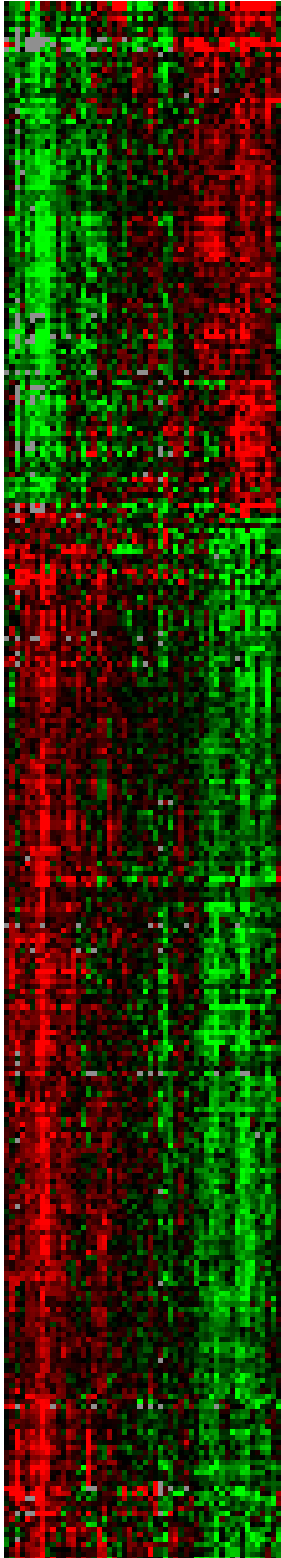

Table with 2 columns: Gene Name and P-value. The table lists numerous genes and their associated p-values, many of which are marked with an asterisk to indicate statistical significance.

| Gene Name | P-value |
|-----------|---------|
| ADAM10    | 0.0001  |
| ADAM11    | 0.0001  |
| ADAM12    | 0.0001  |
| ADAM13    | 0.0001  |
| ADAM14    | 0.0001  |
| ADAM15    | 0.0001  |
| ADAM16    | 0.0001  |
| ADAM17    | 0.0001  |
| ADAM18    | 0.0001  |
| ADAM19    | 0.0001  |
| ADAM20    | 0.0001  |
| ADAM21    | 0.0001  |
| ADAM22    | 0.0001  |
| ADAM23    | 0.0001  |
| ADAM24    | 0.0001  |
| ADAM25    | 0.0001  |
| ADAM26    | 0.0001  |
| ADAM27    | 0.0001  |
| ADAM28    | 0.0001  |
| ADAM29    | 0.0001  |
| ADAM30    | 0.0001  |
| ADAM31    | 0.0001  |
| ADAM32    | 0.0001  |
| ADAM33    | 0.0001  |
| ADAM34    | 0.0001  |
| ADAM35    | 0.0001  |
| ADAM36    | 0.0001  |
| ADAM37    | 0.0001  |
| ADAM38    | 0.0001  |
| ADAM39    | 0.0001  |
| ADAM40    | 0.0001  |
| ADAM41    | 0.0001  |
| ADAM42    | 0.0001  |
| ADAM43    | 0.0001  |
| ADAM44    | 0.0001  |
| ADAM45    | 0.0001  |
| ADAM46    | 0.0001  |
| ADAM47    | 0.0001  |
| ADAM48    | 0.0001  |
| ADAM49    | 0.0001  |
| ADAM50    | 0.0001  |
| ADAM51    | 0.0001  |
| ADAM52    | 0.0001  |
| ADAM53    | 0.0001  |
| ADAM54    | 0.0001  |
| ADAM55    | 0.0001  |
| ADAM56    | 0.0001  |
| ADAM57    | 0.0001  |
| ADAM58    | 0.0001  |
| ADAM59    | 0.0001  |
| ADAM60    | 0.0001  |
| ADAM61    | 0.0001  |
| ADAM62    | 0.0001  |
| ADAM63    | 0.0001  |
| ADAM64    | 0.0001  |
| ADAM65    | 0.0001  |
| ADAM66    | 0.0001  |
| ADAM67    | 0.0001  |
| ADAM68    | 0.0001  |
| ADAM69    | 0.0001  |
| ADAM70    | 0.0001  |
| ADAM71    | 0.0001  |
| ADAM72    | 0.0001  |
| ADAM73    | 0.0001  |
| ADAM74    | 0.0001  |
| ADAM75    | 0.0001  |
| ADAM76    | 0.0001  |
| ADAM77    | 0.0001  |
| ADAM78    | 0.0001  |
| ADAM79    | 0.0001  |
| ADAM80    | 0.0001  |
| ADAM81    | 0.0001  |
| ADAM82    | 0.0001  |
| ADAM83    | 0.0001  |
| ADAM84    | 0.0001  |
| ADAM85    | 0.0001  |
| ADAM86    | 0.0001  |
| ADAM87    | 0.0001  |
| ADAM88    | 0.0001  |
| ADAM89    | 0.0001  |
| ADAM90    | 0.0001  |
| ADAM91    | 0.0001  |
| ADAM92    | 0.0001  |
| ADAM93    | 0.0001  |
| ADAM94    | 0.0001  |
| ADAM95    | 0.0001  |
| ADAM96    | 0.0001  |
| ADAM97    | 0.0001  |
| ADAM98    | 0.0001  |
| ADAM99    | 0.0001  |
| ADAM100   | 0.0001  |
