# Supplementary material for: Limited Systemic Sclerosis Patients with Pulmonary Arterial Hypertension Show Biomarkers of Inflammation and Vascular Injury
Source: PubMed Central journal article supplement (PMC2923145; doi:10.1371/journal.pone.0012106), 2010-08-17

Figure S3

A

Dropping out Extreme ILD and PCWP > 15

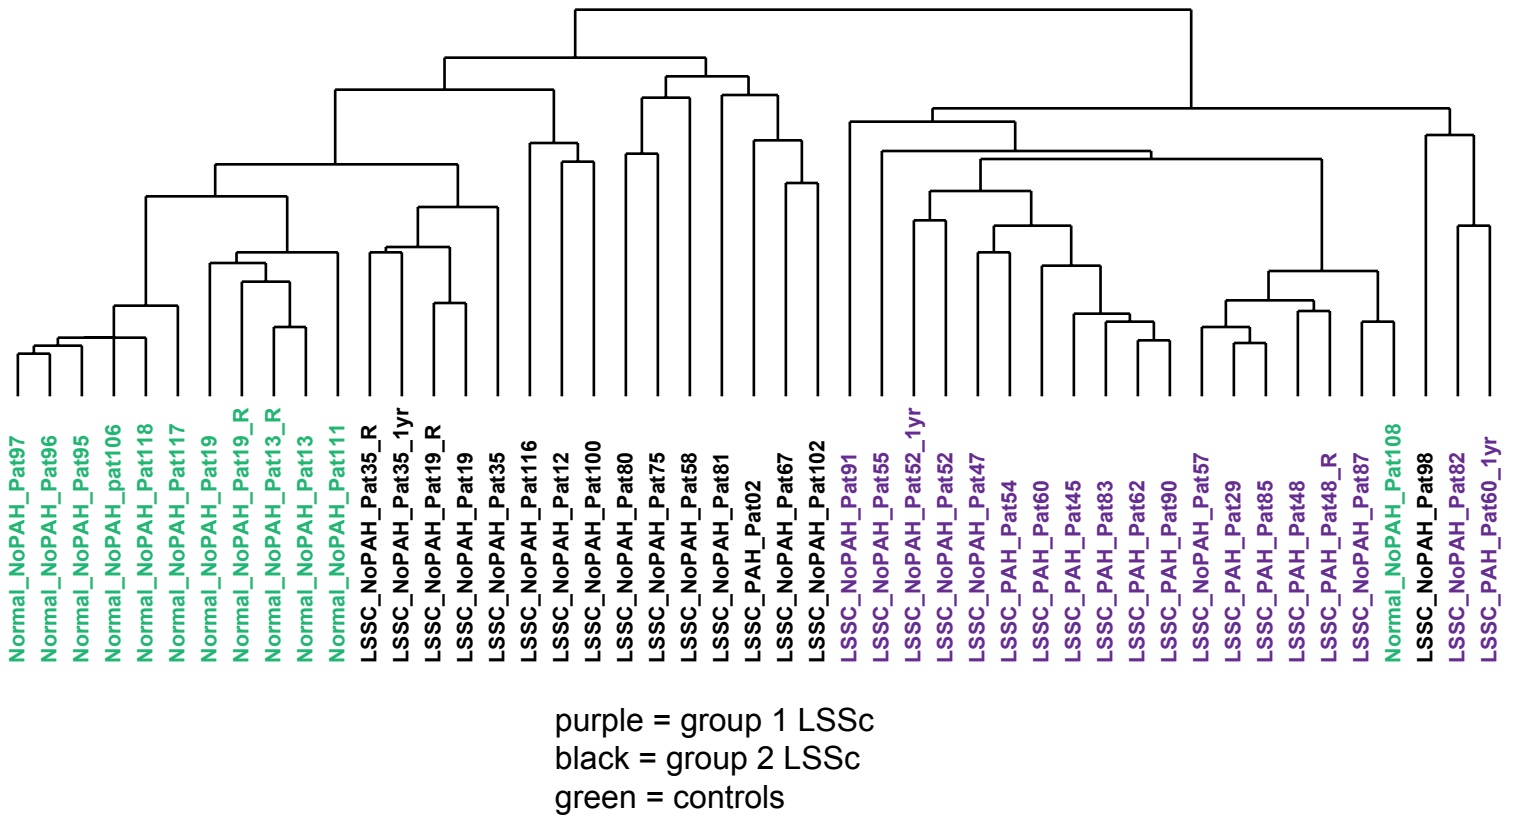

B

Dropping out Extreme ILD and PCWP > 15

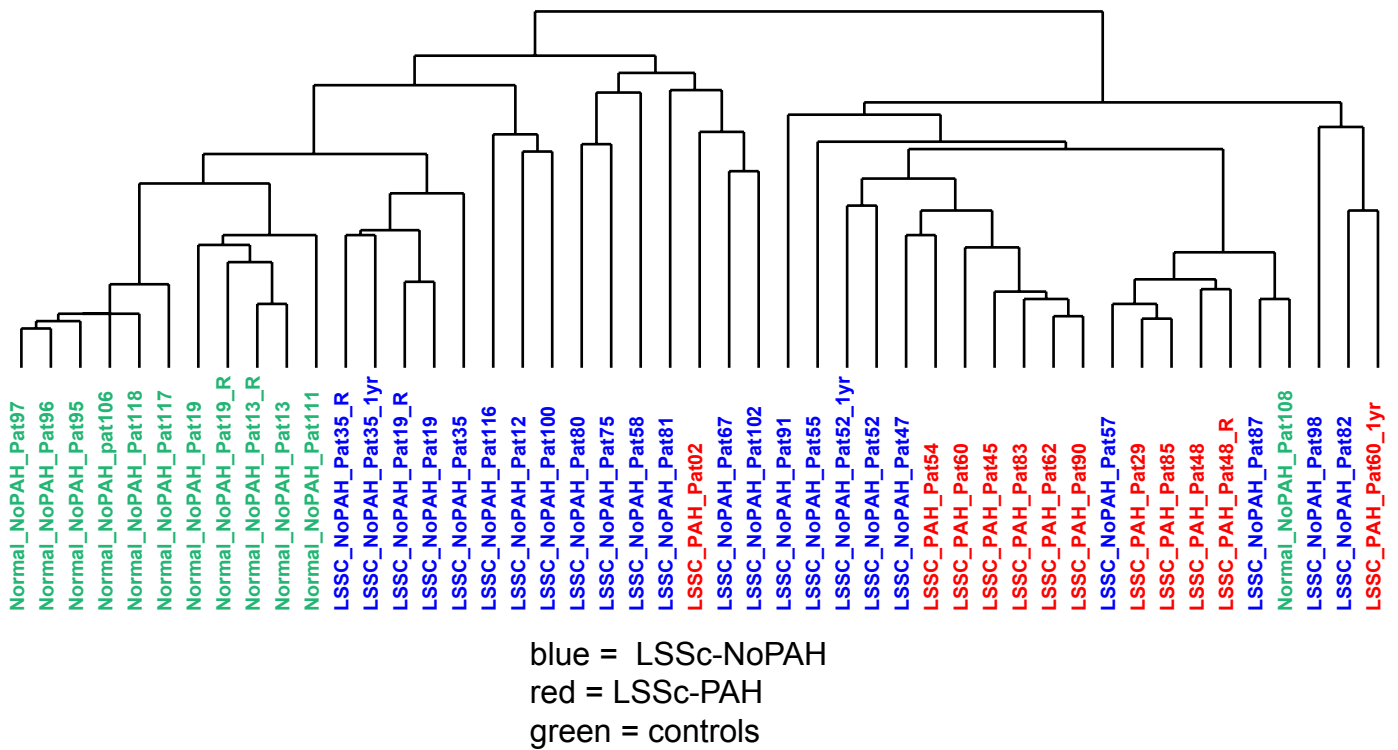

Supplement: pone.0012106.s003.pdf [file pone.0012106.s003.pdf]
